# Supplementary material for: Environmentally benign process for selective recovery of valuable metals from spent lithium-ion batteries by using conventional sulfation roasting
Source: Royal Society of Chemistry journal article supplement (doi:10.1039/c9gc01350d), 2019-01-01
Supplement: c9gc01350d1.pdf [file c9gc01350d1.pdf]

1        **Environmentally benign process on selective recovery of**  
2        **valuable metals from spent lithium-ion batteries by using**  
3        **conventional sulfation roasting**

4        Jiao Lin, Chunwei Liu, Hongbin Cao, Renjie Chen, Yongxia Yang, Li Li, Zhi Sun

5

6        **Results**

7

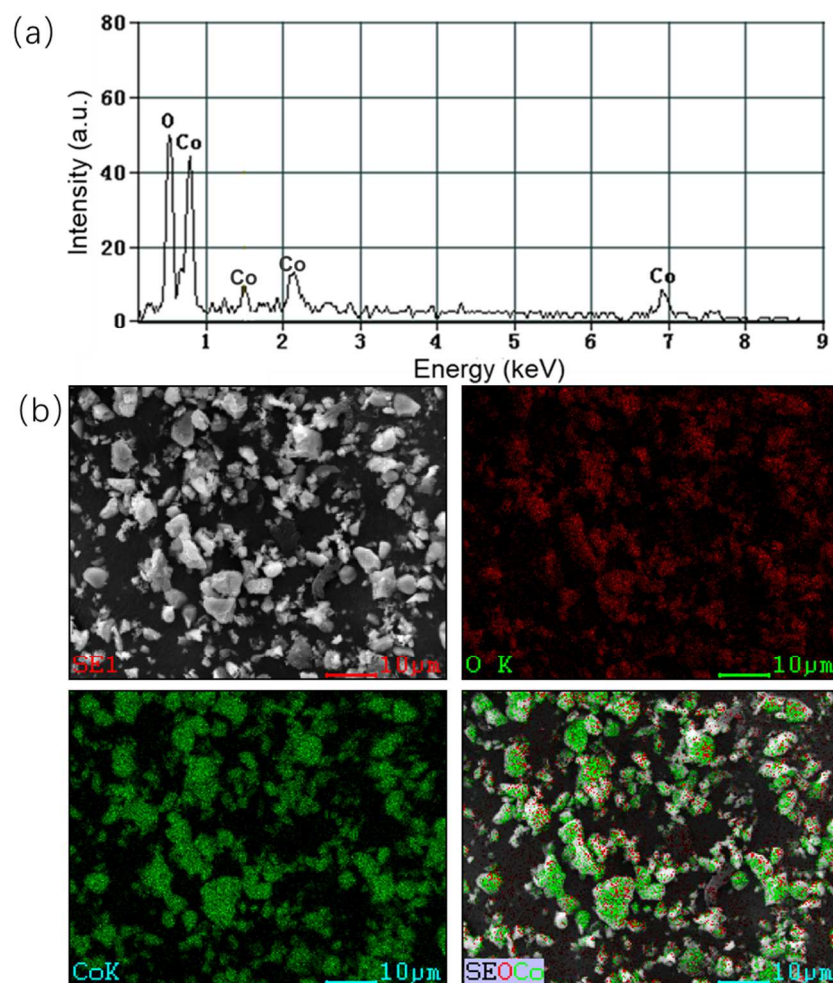

8

9        **Figure S1. (a) EDS spectrum of the recycled  $\text{Co}_3\text{O}_4$  sample, (b) mapping of various elements**

10        **of obtained on the recycled  $\text{Co}_3\text{O}_4$  sample**

11

12        **Discussion**

13        Through the calculation of the lithium content of the  $\text{LiCoO}_2$  scrap and the amount of  $\text{H}_2\text{SO}_4$

14        required, and the amount of  $\text{H}_2\text{SO}_4$  required for the conversion of lithium to lithium sulfate, the

15 problem of sulfur in the sulfuric acid of the process route developed in this paper is determined.  
 16 Specifically, 5 g of LiCoO<sub>2</sub> cathode scrap was taken, mixed with 1.370ml of H<sub>2</sub>SO<sub>4</sub> (98%,  
 17 25.21mmol) in a ratio of 2:1, and then dried at 393 K for 720 minutes. After drying, the slurry was  
 18 refined to obtain 7.0046 g of a mixed homogeneous powder. The material was placed in a tube  
 19 furnace and roasted under a set procedure, and roasted to obtain 6.6835 g of calcined clinker. After  
 20 leaching for 180 minutes at a solid-liquid ratio of 400 g/L at room temperature, the concentration of  
 21 Li<sup>+</sup> in the leachate was analyzed by ICP-6300. The results showed that the concentration of Li<sup>+</sup> in  
 22 the total volume of 16.71 ml of the leachate was 19.96 g/L.

$$23 \quad m_{Li} = \rho_{Li} V_{Li} \quad (S1)$$

24 where  $m_{Li}$ ,  $\rho_{Li}$  and  $V_{Li}$  are the mass of the element "i" in the leachate, the concentration of Li<sup>+</sup> in the  
 25 leachate and the volume of the leachate, respectively.

26  
 27 According to the formula of S1, the total mass of Li in the leachate is 0.3335 g, and the molar mass  
 28 thereof is 48.05 mmol, and the SO<sub>4</sub><sup>2+</sup> ion theoretically bound to Li<sup>+</sup> is at least 24.02 mmol. The  
 29 actual amount of H<sub>2</sub>SO<sub>4</sub> added in the 5g scrap powder is 25.21mmol. Ignoring the loss error and  
 30 test error in the experiment, it can be considered that the sulfur in the added H<sub>2</sub>SO<sub>4</sub> is completely  
 31 combined with Li<sup>+</sup>, and there is no loss or escape of sulfur.

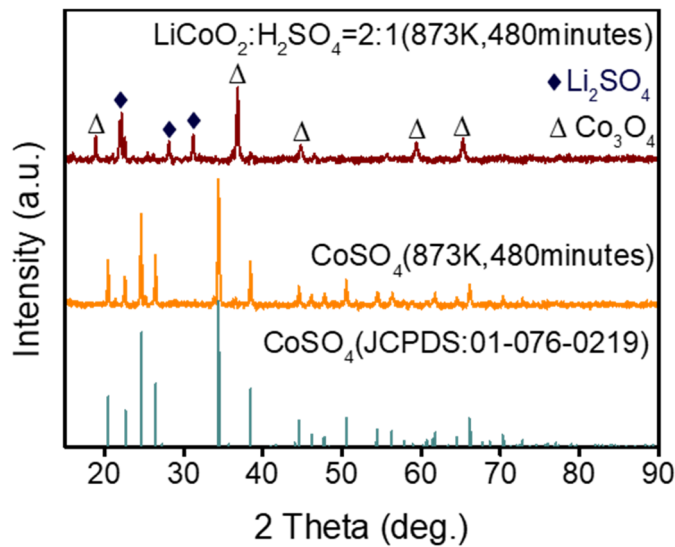

33  
 34 **Figure S2.** XRD pattern of the roasted materials (LiCoO<sub>2</sub>:H<sub>2</sub>SO<sub>4</sub>=2:1, roasting temperature=873 K, roasting  
 35 time=480minutes) and the roasted CoSO<sub>4</sub> material (roasting temperature=873 K, roasting time=480 minutes)

36

37

**Table S1. Leaching rate of metal elements in different lithium ion batteries**

38

| Element | Li    | Co%  | Ni   | Mn   |
|---------|-------|------|------|------|
| L(%)    | 99.22 | 0.02 | 0.08 | 0.05 |

39

40

<sup>a</sup> the roasted powders were leached by water with S:L of 400 g/L just the once.

41

42

**Economic feasibility.** The recycling process in this study can be divided into four parts: Drying;

43

High temperature roasting; Leaching and filtering; Precipitation and purification. Assume that 1 ton

44

of spent LiCoO<sub>2</sub> scrap were treated by the proposed green recycling process in China. The working

45

day is 300 days per year (average 25 days per month) while the work time is about 8 hours every

46

day. And the average wage of per labor is 74318 CNY per year (\$39 per day, 1\$=6.367 CNY) in

47

china. And the industrial electricity charge is \$0.20 /kWh (maximum), the industrial water charge is

48

\$0.40/t (maximum), the industrial H<sub>2</sub>SO<sub>4</sub> cost is \$70/t.<sup>1</sup>

49

Considering the residuals rate and interest rate, depreciation cost of equipment is calculated as Eq.

50

(S2) while the cost of equipment maintenance cost is calculated as Eq. (S3):

51

$$C_D = C_o \cdot (1 - r) \cdot \frac{i}{1 - (1 + i)^{-n}} \quad (S2)$$

52

$C_D$  — — — Depreciation cost of equipment

53

$C_o$  — — — Acquisition cost of equipment

54

$r$  — — — Residuals rate of equipment, 4%

55

$i$  — — — Interest rate, 10%

56

$n$  — — — Service life, year

57

58

$$M_c = 0.05 \cdot C_o \quad (S3)$$

59

$M_c$  — — — Maintenance cost of equipment

60

$C_o$  — — — Acquisition cost of equipment

61

And the energy consumption, the cost of energy, water and labor are calculated as Eq. (S4), (S5),

62

(S6) and (S7):

63

$$E_p = P \cdot t \cdot n \quad (S4)$$

64

$E_p$  — — — Energy consumption of the process

65  $P$  — — — Equipment power, Kw

66  $t$  — — — Working time of equipment

67  $n$  — — — number of equipments

68

$$69 \quad C_p = E_p \cdot p_e \quad (S5)$$

70  $C_p$  — — — Cost of energy

71  $E_p$  — — — Energy consumption of the process

72  $p_e$  — — — Electricity price for industrial uses, \$0.20/kWh

73

$$74 \quad C_w = m \cdot p_w \quad (S6)$$

75  $C_w$  — — — Cost of water

76  $m$  — — — Water consumption, ton

77  $p_w$  — — — Water price for industrial uses, \$0.91/t

78

$$79 \quad C_l = n \cdot p_l \quad (S7)$$

80  $C_l$  — — — Cost of labor

81  $n$  — — — number of workers

82  $p_l$  — — — Wage of per labor, \$39/day

83 Finally, the energy consumption and the cost of every process and revenue of products in this study

84 were calculated in detailed and then a profit was obtained by recycling 1 ton spent LiCoO<sub>2</sub> batteries

85 with the current process as follows in China.

### 86 **Process I: Drying**

87 **Drying requirement:** Four conveyor drier (P=20Kw, per price=\$15180, maximum capacity =  
88 300kg/per, service life = 5 years) is needed to work for 12h.

$$89 \quad C_D = C_o \cdot (I - r) \cdot \frac{i}{I - (I + i)^{-n}} = (\$15180 \times \frac{1}{300}) \times (I - 4\%) \times \frac{10\%}{I - (I + 10\%)^{-5}} = \$12.81$$

$$90 \quad M_e = 0.05 \cdot C_o = 0.05 \times (\$15180 \times \frac{1}{300}) = \$2.53$$

$$91 \quad E_p = P \cdot t \cdot n = 20kW \times 12h \times 4 = 960kW \cdot h$$

$$C_p = E_p \cdot p_e = 960kW \cdot h \times \$0.2 / kWh = \$192$$

93  $C_l = n \cdot p_l = 1 \times \$39 = \$39$

94 The H<sub>2</sub>SO<sub>4</sub> solution and water were used in this process, and 500 kg of H<sub>2</sub>SO<sub>4</sub> and 400 kg of water  
 95 are required for per ton of LiCoO<sub>2</sub> scrap recovered.

96  $C_h = m \cdot p_h = 0.5 \times 70 = \$35$

97  $C_w = m \cdot p_w = 0.4 \times 0.91 = \$0.36$

98 Total costs: \$281.7

99 After this process, the dried powders are about 1.4ton.

100 **Process II: High temperature roasting**

101 **High temperature roasting requirement:** Three heating equipment (P<sub>w</sub> = 55 kW, per price =  
 102 \$216000, maximum capacity = 300 kg/per, service life = 5 years) are needed to respectively work  
 103 for 4h every day. In this process, the obtained mixed electrode materials were roasted, which means  
 104 every device needs to work 2 times every day.

105 Electric power charge: the working time including temperature rise and hold is 3 hour and the  
 106 cooling time is 1 hour.

107  $C_D = C_o \cdot (1-r) \cdot \frac{i}{1-(1+i)^{-n}} = (\$216000 \times 3 \times \frac{1}{300}) \times (1-4\%) \times \frac{10\%}{1-(1+10\%)^{-5}} = \$546$

108  $M_e = 0.05 \cdot C_o = 0.05 \times (\$216000 \times 3 \times \frac{1}{300}) = \$108$

109  $E_p = P \cdot t \cdot n = 55kW \times 4h \times 6 = 1320kW \cdot h$

$C_p = E_p \cdot p_e = 1320kW \cdot h \times \$0.2 / kWh = \$264$

111  $C_l = l \cdot p_l = 1 \times \$39 = \$39$

112 Total costs: \$957

113 After this process, the calcined powders are about 1.27 ton

114 **Process III: Leaching and filtering**

115 **Leaching and filtering requirements:** the calcined powders are leached by water once with S: L  
 116 of 400 g/L for 180 min. A set of frame filter (P<sub>w</sub> =10 Kw, per price=\$8350, maximum capacity =  
 117 30 m<sup>2</sup>/per, service life = 5 years) is needed to work for 1 h. About 3.65 ton of water is consumed.

118  $C_D = C_o \cdot (1-r) \cdot \frac{i}{1-(1+i)^{-n}} = (\$8350 \times \frac{1}{300}) \times (1-4\%) \times \frac{10\%}{1-(1+10\%)^{-5}} = \$7.05$

119  $M_e = 0.05 \cdot C_o = 0.05 \times (\$8350 \times \frac{1}{300}) = \$1.42$

120  $E_p = P \cdot t \cdot n = 10kW \times 1h \times 1 = 10kW \cdot h$

121  $C_p = E_p \cdot p_e = 10kW \cdot h \times \$0.2 / kWh = \$2$

122  $C_w = m \cdot p_w = 3.65t \times \$0.91 / t = \$3.32$

123  $C_i = n \cdot p_i = 1 \times \$39 = \$39$

124 Total costs: \$52.79

125

126 **Process VI: Precipitation and purification**

127 Precipitation requirement: two set of glass lining reactors (Internal Electric Heater) (P=25 Kw, per  
128 price=\$1955, maximum capacity =500 L/per, service life = 5 years) are needed to respectively work  
129 for 4 h including temperature rise and hold. About 5 ton water was consumed.

130  $C_D = C_o \cdot (I - r) \cdot \frac{i}{I - (I + i)^{-n}} = (\$1955 \times \frac{I}{300}) \times (I - 4\%) \times \frac{10\%}{I - (I + 10\%)^{-5}} = \$1.65$

131  $M_c = 0.05 \cdot C_o = 0.05 \times (\$1955 \times \frac{I}{300}) = \$0.33$

132  $E_p = P \cdot t \cdot n = 25kW \times 4h \times 2 = 200kW \cdot h$

133  $C_p = E_p \cdot p_e = 100kW \cdot h \times \$0.2 / kWh = \$20$

134  $C_w = m \cdot p_w = 5t \times \$0.91 / t = \$4.55$

135  $C_i = n \cdot p_i = 0.5 \times \$39 = \$39$

136 After this process,456 kg of  $Li_2CO_3$  can be recycled.

137 Purification requirement: Purification of  $Co_3O_4$ (II, III) in leaching slag by wet magnetic flotation  
138 technology. Purification equipment (P = 40 kW, per price = \$36000, maximum capacity = 1ton/hour,  
139 service life = 5 years)

140  $C_D = C_o \cdot (I - r) \cdot \frac{i}{I - (I + i)^{-n}} = (\$36000 \times \frac{I}{300}) \times (I - 4\%) \times \frac{10\%}{I - (I + 10\%)^{-5}} = \$30.38$

141  $M_c = 0.05 \cdot C_o = 0.05 \times (\$36000 \times \frac{I}{300}) = \$6$

142  $E_p = P \cdot t \cdot n = 40kW \times 3h \times 1 = 120kW \cdot h$

143  $C_p = E_p \cdot p_e = 120kW \cdot h \times \$0.2 / kWh = \$24$

144  $C_i = n \cdot p_i = 0.5 \times \$39 = \$39$

145 Total costs: \$115.53

146 After this process,741 kg of  $Co_3O_4$ (II, III) can be recycled.

147 In summary, when dealing with 1ton spent  $\text{LiCoO}_2$  scrap, the total cost in this study is \$1407.

148

### 149 Environmental Assessment

150

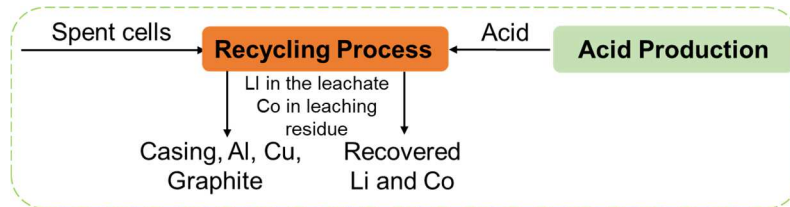

151

152

152 **Figure S3. Recycling processes environmental analysis boundary**

153

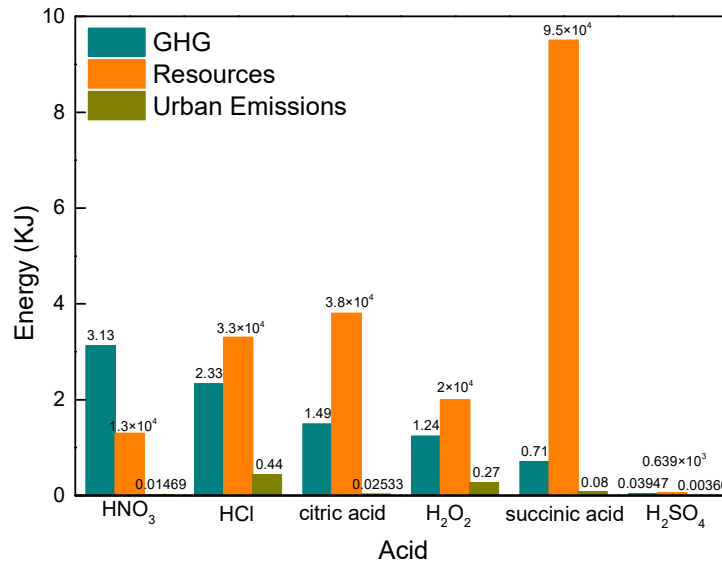

154

155

155 **Figure S4. Environmental impact of different acid production processes**

156 <sup>a</sup> The environmental impact is modeled using Argonne National Laboratory's Greenhouse Gases,

157

Regulated Emissions, and Energy use in Transportation (GREET) model

158

159 In this document, we provide details of parameter development for the environmental analysis of

160 the sulfation roasting recycling process.

161

### 162 Discharging

163

In the first step of this recycling process, spent LIBs are deconstructed into cells. The cells are discharged,

164

then physically separated into constituents of cathode, anode, and casing. To estimate the energy intensity

165

of the discharging step, we calculate the energy intensity of the discharge step from Equation S8:

$$EI_{Co,R} = \frac{a_{cathode} EI_{discharge}}{f_{cell} f_{AM} f_{AM,Co} f_R} \quad (S8)$$

167 where  $EI_{Co,R}$  is the energy intensity of the discharge step in units of mmBtu/ton recovered Co;  
 168  $a_{cathode}$  is the allocation factor for Co (0.50);  
 169  $EI_{discharge}$  is the energy intensity of the cycling step in battery manufacturing (0.034 mmBtu/ton battery);  
 170  $f_{cell}$  is the fraction of the battery mass made up of cells (0.67);  
 171  $f_{AM}$  is the fraction of active material per mass of battery (38%);  
 172  $f_{AM,Co}$  is the fraction of cobalt in the active material (56.96%); and  
 173  $f_R$  is the fraction of cobalt that is recovered (98%).

174  
 175 The battery cells being discharged comprise the casing, the cathode (active materials and aluminum foil),  
 176 copper, and graphite. Although these cells were taken from laptop batteries, we assume that their makeup  
 177 is similar to vehicle cells and we use parameters in a model developed by Nelson et al. to determine the  
 178 ratio of the mass of cathode to the mass of the entire cell, which is  $a_{cathode}$  in Equation S8. The mass of  
 179 active material in the spent lithium-ion batteries was 380 g.<sup>2</sup>

180

#### 181 NMP Bath

182 After discharging, the copper sheet and graphite of the anode are manually (at the laboratory scale)  
 183 separated from the cathode and the casing. The cathode is soaked in warm N-methylpyrrolidone (NMP)  
 184 at 100°C to separate it from the aluminum foil. To determine the energy intensity for this step, we use  
 185 Equation S9:

$$EI_{Soak} = \frac{a_{AM} \Delta T}{m_{AM} f_{AM,Co} \eta} \sum C_{p,i} m_i \quad (S9)$$

187 where  $EI_{Soak}$  is the energy intensity of the NMP soaking stage;  
 188  $a_{AM}$  is the allocation ratio for the active material (0.87);  
 189  $\Delta T$  is the change in temperature (75 °C);  
 190  $\eta$  is the efficiency of the natural gas boiler that is providing steam to heat the vessel (80%);  
 191  $m_{AM}$  is the mass of active material;  
 192  $C_{p,i}$  is the heat capacity of either NMP (2.1 J/g °C), the active material (1.0 J/g °C), or aluminum (0.90



193 J/g °C); and

194  $m_i$  is the mass of NMP, the active material, or aluminum.

195

196 We assumed a mass ratio of NMP to active material of 1:1 and used the mass ratio of aluminum foil to  
197 active material in Table S2 to calculate  $m_i$  values. The heat capacity of the active material is based upon  
198 solid-compound heat capacity data. Further, we assume NMP losses are negligible because residual NMP  
199 filtered from the active material can be reused.

200

201

**Table S2. Mass ratios of cell components to active material**

| Component               | Mass ratio of component to active material |
|-------------------------|--------------------------------------------|
| Casing                  | 0.12                                       |
| Copper                  | 0.34                                       |
| Graphite (anode)        | 0.37                                       |
| Aluminum foil (cathode) | 0.16                                       |

202

203

#### 204 Crushing

205 Next, the active material undergoes crushing in a planetary ball mill. To estimate the energy intensity of  
206 this step that precedes roasting, we calculated the energy intensity per ton of recovered cobalt by dividing  
207 the energy intensity per ton of total material by the fraction of cobalt in the active material (56.96%) and  
208 again by the recovery efficiency (95%).

$$209 \quad EI_{\text{crush,Co}} = \frac{Q_{\text{crush}}}{\eta} \times m_{\text{Co}} \quad (\text{S10})$$

210 where  $EI_{\text{crush,Co}}$  is the energy intensity of the crushing step (mmBtu/ton cobalt);

211  $Q_{\text{crush}}$  is the energy input per mass of battery (0.65mmBtu/ton cobalt);

212  $\eta$  is the grinding efficiency of the ball mill (95%); and

213  $m_{\text{Co}}$  is the mass fraction of cobalt in the alloy (0.57).

214

#### 215 Roasting

216 To determine the energy intensity of the roasting step allocated to cobalt, we used Equation S11.

$$217 \quad EI_{roast,Co} = \frac{Q_{roast}}{f_{Co,batt}} \times m_{Co} \quad (S11)$$

218 where  $EI_{smelt, Co}$  is the energy intensity of the roasting step (mmBtu/ton cobalt);

219  $Q_{roast}$  is the energy input per mass of battery (5.45mmBtu/ton cobalt);

220  $f_{Co,batt}$  is the mass fraction of cobalt in the fed batteries (0.57); and

221  $m_{Co}$  is the mass fraction of cobalt in the alloy (0.43).

222

223 To select an energy intensity for the calcining step, we chose a best value to use in the analysis of the

224 recycling process of 2.3 MJ/kg. Calcining processes also consume electricity. We adopted the average

225 electricity consumption of the processes 0.09 MJ electricity/kg. We used the stoichiometric ratio of Co

226 in  $LiCoO_2$  (0.57 kg Co/kg  $LiCoO_2$ ) and the recovery efficiency to calculate an energy intensity for this

227 step per mass of recovered cobalt.

228

### 229 Leaching

230 We calculated the energy intensity of the leaching steps with Equation S12.

$$231 \quad EI_{leaching,Co} = \frac{EI_{leaching}}{m_{Co}} \times a_l \quad (S12)$$

232 where  $EI_{leaching, Co}$  is the energy intensity of the leaching steps allocated to cobalt (mmBtu/ton cobalt);

233  $EI_{leach}$  is the energy intensity of the leaching step (0.12mmBtu/ton alloy);

234  $a_l$  is the mass allocation ratio for cobalt for the leaching step (0.9)

235 We used the stoichiometric ratio of Co in  $LiCoO_2$  (0.57 kg Co/kg  $LiCoO_2$ ) and the recovery efficiency

236 to calculate an energy intensity for this step per mass of recovered cobalt.

237

238

239

240

241

242

243

244

**Table S3. The purchased energy intensity of different recycling process**

| Hydrometallurgical Process |                                                          |          | Pyrometallurgical Process |                                                          |        | Sulfation Roasting Recycling Process |                                                         |          |
|----------------------------|----------------------------------------------------------|----------|---------------------------|----------------------------------------------------------|--------|--------------------------------------|---------------------------------------------------------|----------|
| Step                       | Purchased Energy Intensity (mmBtu/ton recovered product) |          | Step                      | Purchased Energy Intensity (mmBtu/ton recovered product) |        | Step                                 | Purchased Energy Intensity(mmBtu/ton recovered product) |          |
|                            | Lithium                                                  | Aluminum |                           | Lithium                                                  | Cobalt |                                      | Cobalt                                                  | Aluminum |
| Discharging                | 1.02                                                     | 0.46     | Smelting                  | 0.41                                                     | 1.45   | Discharging                          | 0.12                                                    | 0.12     |
| NMP soak                   | 2.91                                                     | 0.63     | Leaching                  | 0.15                                                     | 0.52   | NMP soak                             | 0.7                                                     | 0.63     |
| Crushing                   | 1.74                                                     | 0        | Solvent Extraction        | 0                                                        | 0      | Crushing                             | 0.39                                                    | 0        |
| Calcination                | 3.25                                                     | 0        | Oxidation                 | 0                                                        | 0      | Roasting                             | 4.11                                                    | 0        |
| Grinding                   | 0.2                                                      | 0        | Firing                    | 2.4                                                      | 8.0    | Leaching                             | 0.19                                                    | 0        |
| Leaching                   | 0.2                                                      | 0        |                           |                                                          |        |                                      |                                                         |          |
| Total                      | 9.32                                                     | 1.09     | Total                     | 3.0                                                      | 9.9    | Total                                | 5.51                                                    | 0.75     |

246

247

<sup>a</sup> British thermal units (Btu, 1 quadrillion Btu = 293 TW h)<sup>3</sup>

248

- 249 1. Yang Y, Meng X, Cao H, Lin X, Liu C, Sun Y, *et al.* Selective recovery of lithium from spent  
250 lithium iron phosphate batteries: a sustainable process. *Green Chemistry* 2018, **20**(13): 3121-  
251 3133.
- 252
- 253 2. Li L, Dunn JB, Zhang XX, Gaines L, Chen RJ, Wu F, *et al.* Recovery of metals from spent  
254 lithium-ion batteries with organic acids as leaching reagents and environmental assessment.  
255 *Journal of Power Sources* 2013, **233**: 180-189.
- 256
- 257 3. Zhang X, Li L, Fan E, Xue Q, Bian Y, Wu F, *et al.* Toward sustainable and systematic recycling  
258 of spent rechargeable batteries. *Chemical Society reviews* 2018.
- 259

260
